# Contextual interference effect is independent of retroactive inhibition but variable practice is not always beneficial

Benjamin Thürer<sup>1,2\*</sup>, Sarah Gedemer<sup>2</sup>, Anne Focke<sup>2</sup>, Thorsten Stein<sup>2</sup>

1: Brain Signaling Group, Institute of Basic Medical Sciences, Department of Molecular Medicine, University of Oslo, Oslo, Norway

2: BioMotion Center, Institute of Sports and Sports Science, Karlsruhe Institute of Technology, Karlsruhe, Germany

Correspondence:

Dr. Benjamin Thürer

[benjamin.thurer@medisin.uio.no](mailto:benjamin.thurer@medisin.uio.no)

## Abstract

Positive effects of variable practice conditions on subsequent motor memory consolidation and generalization are widely accepted and described as the contextual interference effect (CIE). However, the general benefits of CIE are low and these benefits might even depend on decreased retest performances in the blocked-practicing control group, caused by retroactive inhibition. The aim of this study was to investigate if CIE represents a true learning phenomenon or possibly reflects confounding effects of retroactive inhibition. We tested 48 healthy human participants adapting their reaching movements to three different force field magnitudes. Subjects practiced the force fields in either a Blocked (B), Random (R), or Constant (C) schedule. In addition, subjects of the Blocked group performed either a retest schedule that did (Blocked-Matched; BM) or did not (Blocked-Unmatched; BU) control for retroactive inhibition. Results showed that retroactive inhibition did not affect the results of the BU group much and that the Random group showed a better consolidation performance compared to both Blocked groups. However, compared to the Constant group, the Random group showed only slight benefits in its memory consolidation of the mean performance across all force field magnitudes and no benefits in absolute performance values. This indicates that CIE reflects a true motor learning phenomenon, which is independent of retroactive inhibition. However, random practice is not always beneficial over constant practice.

Keywords: Motor memory consolidation, Force field adaptation, Sensorimotor learning, Motor adaptation, Retrograde inhibition, Contextual interference, Variable practice

## 1. Introduction

It is widely accepted that variable practice conditions can be beneficial for motor memory consolidation (Schmidt, 1975; Shea & Morgan, 1979). In particular, the contextual interference effect (CIE) – originally formulated by Battig (1972) for verbal learning – describes an increased retest and transfer performance (Shea & Morgan, 1979; Magill & Hall, 1990) due to highly-interfering cognitive processes during random practice conditions (Kantak et al., 2010; Lage et al., 2015). This effect seems to be more robust in basic research than in applied settings (Brady 2004, Brady 2008). In addition, CIE is commonly examined by comparing a random with a blocked practice schedule and test for their corresponding effects on posttest and transfer test performance. In such a random practice schedule, different tasks (or parameters) change randomly from trial to trial, whereas, in a blocked practice schedule, one specific task (or parameter constellation) is practiced as a whole block first, before switching to the next task (or parameter constellation).

47           Although CIE seems to be robust, there is no widely accepted hypothesis that accounts for  
48 this effect. Classical explanations include the elaboration hypothesis (Shea & Zimny, 1983), the  
49 reconstruction hypothesis (Lee & Magill, 1983), and the retroactive inhibition hypothesis (Shea &  
50 Titzer, 1993). Thus, it is still unsolved whether CIE stems from an increased memory consolidation  
51 due to the random practice condition (e.g. elaboration or reconstruction hypothesis) or by a  
52 decreased retention performance of the blocked practice condition (retroactive inhibition  
53 hypothesis). This latter assumption – which is in the focus of this paper – derives from the  
54 observation that subsequent learning of different tasks can lead to inhibition of a previous memory,  
55 an effect called retroactive inhibition (see Robertson et al., 2004 for a review). Concerning CIE,  
56 retroactive inhibition might lead to disadvantages for the blocked practicing subjects since their  
57 previous memory might be inhibited due to the blocked practice schedule. Therefore, these subjects  
58 might show the worst performance when recalling the first task and the best performance when  
59 recalling the last task they have practiced. Previous work showed possible confounding effects of  
60 this retroactive inhibition on the motor retrieval after blocked practice and, therefore, questioned  
61 the validity of CIE (Del Rey et al., 1994, Shewokis et al., 1998). Furthermore, when retroactive  
62 inhibition was eliminated by using a reminder trial, no differences in memory recall were observed  
63 between random and blocked practice schedules (Shea & Titzer, 1993).

64           So far, CIE and retroactive inhibition were discussed in the context of skill learning, in  
65 which most CIE studies were conducted. Skill learning is commonly defined as a “set of processes  
66 associated with practice or experience leading to relatively permanent changes in the capacity for  
67 skilled movement” (Schmidt et al., 2018, p. 283). In contrast, motor adaptation is interpreted as a  
68 different type of motor learning, in which the motor system responds to changes in environmental  
69 conditions and/or changes in the body to regain the former capacity for a skilled movement under  
70 these new conditions (Krakauer & Manzi, 2011). This study focuses on motor adaptation using  
71 a force field paradigm (Shadmehr & Mussa-Ivaldi, 1994), for which CIE has been demonstrated in  
72 previous studies from our laboratory (Thürer et al., 2017; Thürer & Weber et al., 2018). In these  
73 studies, subjects had to adapt their reaching movements to different force field magnitudes either  
74 in a blocked or random fashion. However, these former studies did not control for retroactive  
75 inhibition and a constant group, practicing only the force field magnitude that needed to be recalled,  
76 was not included.

77           Therefore, the first purpose of this study is to control for the confounding effects of  
78 retroactive inhibition and examine the validity of the contextual interference effect in force field  
79 adaptation. The second purpose of this study is to examine if variable practice schedules (blocked  
80 and random) outperform a constant practice schedule even if subjects of the constant group have  
81 the advantage of adapting their reaching movements only to a single force field.

82

## 83 **2. Methods and Methods**

### 84 **2.1. Participants**

85 This study tested 48 healthy right-handed participants ( $24 \pm 4$  years; 10 women) with no previous  
86 experience at a robotic manipulandum. Handedness was tested by the Edinburgh inventory  
87 (Oldfield, 1971) and participant’s vision was normal or corrected to normal. The study was  
88 approved by the Institutional Review Board. All participants were informed about the protocol and  
89 gave their written informed consent in accordance with the Declaration of Helsinki.

90

### 91 **2.2. Apparatus and experimental task**

92 The experimental task was implemented at a robotic manipulandum (Kinarm End-Point Lab, BKIN  
93 Technologies, Kingston, Canada) which can produce forces via a handle towards the participants’  
94 hands. In addition, we used a virtual reality display that allowed the participants to see the visual

95 information in the horizontal plane (Fig 1A). Please note that vision of handle, hand, and arm was  
 96 occluded by the virtual reality display. Positions and forces of the robot handle were sampled at  
 97 1000 Hz.

98 We will briefly describe the experimental task which can be found elsewhere in more detail  
 99 (Thürer et al., 2017). Participants were seated in front of the manipulandum and the virtual reality  
 100 display was calibrated to the robot's handle. All participants performed center-out reaching  
 101 movements with their dominant (right) hand. While performing this task, the horizontal display  
 102 shows a white cursor which is controlled via the handling of the manipulandum (Fig. 1B). Every  
 103 trial started by holding the cursor in the center target on the screen and a "go" signal was given by  
 104 the highlighting of a target. From that "go" signal on, participants were allowed to start their  
 105 reaching movement without any pressure of time (no fast reaction times required). When  
 106 participants reached the target position, subjects were actively moved backwards to the center  
 107 position by the manipulandum. After a short pause in the center position of 800 ms, the next target  
 108 highlighted in a pseudo-randomized order. In total, six target positions were defined building a  
 109 circle with a diameter of 20 cm surrounding the center point. Pseudo-randomization facilitated that  
 110 in every block of six trials every target highlighted just once and that every participant had a  
 111 different target order so that no influence of target direction was given on the group level.

112 To provide similar movement times across trials and subjects, visual feedback was  
 113 implemented in every single trial. The feedback was given via a change in the target color after  
 114 reaching it. Target color switched to red if the movement was too fast ( $< 450$  ms), blue if it was  
 115 too slow ( $> 550$  ms), and green otherwise.

116 To induce motor adaptation and subsequent memory consolidation, we implemented  
 117 velocity-dependent counter-clockwise directed force fields at the robotic manipulandum. These  
 118 force fields perturbed the participants' movements and typically degraded their initial motor  
 119 performance leading to curved hand trajectories (Fig. 1C). In order to investigate practice schedules  
 120 with different amounts of variabilities, three separate force field viscosities were implemented with  
 121 each viscosity inducing a force field magnitude of either 8, 15, or 22 Ns/m. Therefore, each force  
 122 field magnitude represented an object with different physical properties. The absolute maximum  
 123 perpendicular displacement between the participant's hand path and a direct line joining center  
 124 point and target quantified the motor error (Fig. 1C).  
 125

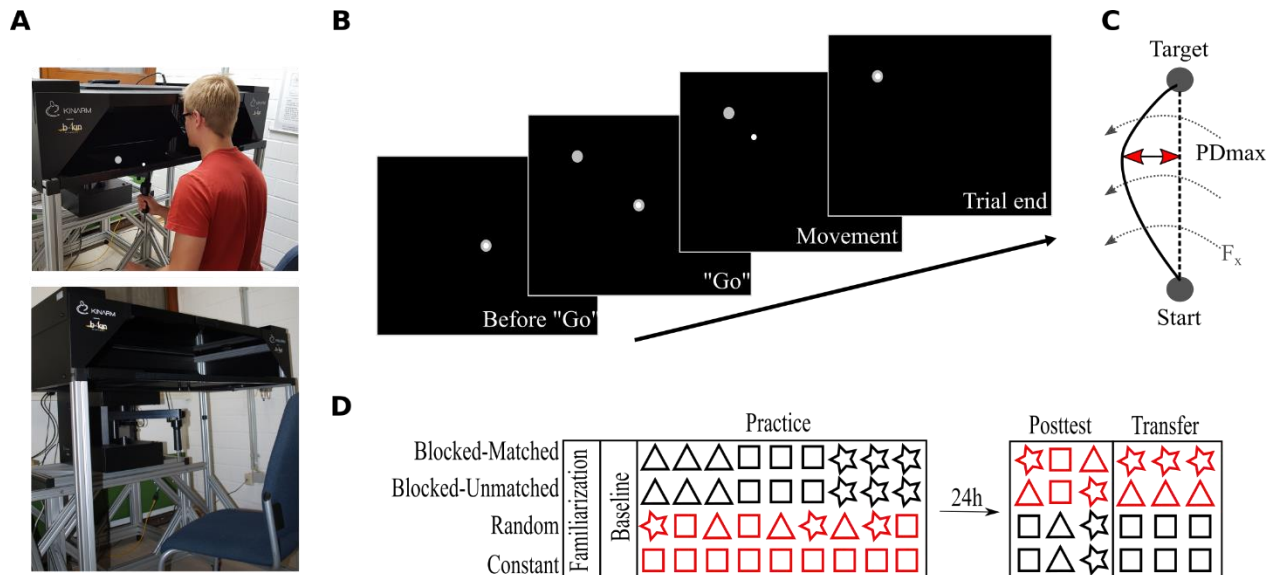

127 Figure 1: Apparatus and task. **A:** Robotic manipulandum with the virtual reality display. Subjects  
128 hold the robotic handle but look into the virtual reality add-on in front of them. In addition, a fabric,  
129 not shown here, was attached to the reality add-on and to the subjects' shoulders to prevented  
130 further visual input of the arms. The virtual cursor is controlled via the robotic handle. Permission  
131 to publish this figure was given by the pictured person. **B:** Experimental task at the robotic  
132 manipulandum. The subjects see the cursor and targets on the screen in the horizontal plane. **C:** the  
133 maximum perpendicular displacement (PD<sub>max</sub>) was used to quantify the motor performance.  
134 Dashed arrows indicate the force field. **D:** Experimental protocol over two consecutive days. Red  
135 colors indicate that both Blocked groups differed in their retest schedule on day 2 whereas the  
136 Random and Constant groups differed in their practice schedules on day 1. Triangles, rectangles,  
137 and stars symbolize different force field magnitudes.

138  
139 **2.3. Experimental procedure**  
140 Participants were equally distributed into 4 groups (Blocked-Matched, BM; Blocked-Unmatched,  
141 BU; Constant, C; Random, R; each  $n = 12$ ). The groups differed only in their task protocol during  
142 Practice and during Retest (Posttest and Transfer). The study took place on two consecutive days  
143 with 24 h between the two test sessions (Fig. 1D).

144 On day 1, all participants received instructions about the behavioral task and performed 144  
145 familiarization trials under null field conditions (motors of the robot were turned off) with two  
146 breaks of 30 s after every 48th trials. Then, participants performed a baseline measurement  
147 consisting 30 null field trials. After that, all participants performed 540 force field trials during  
148 Practice, with a different force field schedule according to their group allocation. To avoid fatigue,  
149 participants had a 30 s break after each 60th trial. The participants performed all trials on day 1  
150 with their dominant right hand.

151 The practice schedule was identical between the two Blocked groups (BM, BU) but  
152 different for the Random and Constant groups. Participants of the Blocked groups performed the  
153 three force field magnitudes (8, 15, 22 Ns/m) in a blocked order. Therefore, all trials of one specific  
154 magnitude were practiced first, before switching to the next magnitude. This resulted in three  
155 blocks, each containing 180 trials of one specific force field magnitude. The Random group  
156 performed a highly-variable practice schedule so that the three force field magnitudes changed on  
157 a single-trial level. For the Constant group, each participant practiced only one specific force field  
158 magnitude (e.g. 15 Ns/m) and, thus, encountered no force field variability at all. The force field  
159 magnitude (for C) and the magnitude order (for BM, BU, and R) was counter-balanced across  
160 participants so that the mean force field magnitude was 15 Ns/m on the group level. In addition,  
161 for the Blocked and Random groups, the mean force field magnitude across the whole Practice  
162 session was 15 Ns/m for each single participant.

163 On day 2, all participants performed a Posttest and Transfer test. To quantify Posttest  
164 performance, all participants performed 18 force field trials divided into three blocks with each  
165 block representing one force field magnitude. Then, participants performed 60 trials of a constant  
166 force field magnitude with their non-dominant left hand (Transfer test) to investigate long-term  
167 effects on the contralateral hand indicated by a previous study from our group (Thürer & Weber et  
168 al., 2018).

169 The order of force field magnitudes on day 2 differed between groups. For the Blocked-  
170 Matched group, the magnitudes in Posttest were in a reversed order compared to Practice and, thus,  
171 "matched" in terms of a reduced effect of retroactive inhibition on the first block of the retest  
172 schedule (Fig. 1D). For instance, when for a specific participant the Practice order was 15, 8, 22  
173 Ns/m, the Posttest order was set to 22, 8, 15 Ns/m. For the Blocked-Unmatched group, however,  
174 the order of force field magnitudes was the same for the Practice and the Posttest session. For



175 instance, when for a specific participant the Practice order was 15, 8, 22 Ns/m, the Posttest order  
176 was set to 15, 8, 22 Ns/m. The order of magnitudes on day 2 was similar for the Random and for  
177 the Constant group. Both groups started the Posttest with the force field magnitude (for C) or with  
178 the mean force field magnitude (for R, i.e. 15 Ns/m) of the Practice session. This is due to a study  
179 that has shown that participants adapt to the mean force field magnitude (Scheidt et al., 2001).  
180 Regarding the Constant group, the first block's magnitude was different between participants for  
181 each single participant had a different magnitude during Practice due to counterbalancing. Both  
182 groups (R, C) were counterbalanced for the order of the remaining two force field magnitudes so  
183 that, still, the mean across groups for the second and third block of the Posttest was at 15 Ns/m.  
184 According to the Posttest, all participants performed the Transfer test on the left hand at a specific  
185 constant force field magnitude, which was the same as the first magnitude in the Posttest (Fig. 1D).  
186

## 187 2.4. Statistics

188 For the statistical analyses, mean performance for the first and the last 6 trials of the Practice session  
189 (Practice FT, Practice LT) was computed. Posttest performance was computed by the mean of the  
190 first, middle, and last 6 Posttest trials (Posttest FT, MT, LT) and the mean across all 18 Posttest  
191 trials (Posttest ALL). Contralateral Transfer performance was quantified by the initial 6 Transfer  
192 trials (Transfer FT) and the whole 60 Transfer trials (Transfer ALL).

193 To test for the possible influence of retroactive inhibition on CIE, we performed mixed-  
194 model 2\*2 ANOVAs with the factors time (Practice LT, Posttest FT; Practice LT, Posttest ALL)  
195 and group (BM, BU). For a possible effect on the generalization from one hand to the other, the  
196 factor time was adjusted accordingly (Practice LT, Transfer FT; Practice LT, Transfer ALL). In  
197 addition, we investigated if random practice even outperforms constant practice by using standard  
198 Fischer t-tests between groups (R, C). Therefore, we calculated differences between each force  
199 field magnitude of the Posttest (Posttest FT, MT, LT, ALL) and the last trials of the Practice session  
200 (Practice LT), respectively.

201 It is widely accepted that p-values alone are not a good marker for potential results in  
202 research (e.g. Nuzzo, 2014). Therefore, besides using classical inferential statistics, we provide  
203 effect sizes (partial eta squared,  $pEta^2$ ; Cohen's d,  $d$ ) and additional Bayesian statistics. Bayesian  
204 statistics are provided in the supplementary material and confirm the results and interpretations of  
205 the classical inferential statistics.

206 All parameters were tested for normal distribution and homogeneity of variances using  
207 Shapiro-Wilk and Levene test. Statistical analyses were performed using MATLAB R2015b  
208 (Mathworks, Natick, USA) and JASP 0.8.6 (Team JASP). Threshold for statistical significance  
209 was set to  $p = 0.05$ . Multiple comparisons were corrected by the False Discovery Rate (FDR,  
210 Benjamini & Hochberg, 1995) and in case of multiple comparisons, p-values in this study represent  
211 the FDR corrected p-value (Benjamini & Yekutieli, 2001).  
212

## 213 3. Results

### 214 3.1. CIE is unaffected by the different retest schedules of the Blocked groups

215 The progress in motor performance for both Blocked groups is depicted in Fig. 2A. First, we tested  
216 if motor adaptation during Practice differed between groups. Both groups (BM, BU) adapted  
217 successfully to the force field schedule during Practice ( $F(1,22) = 104.09$ ,  $p < .001$ ,  $pEta^2 = 0.83$ ,  
218 for the factor time (Practice FT, Practice LT)) and showed no differences in their adaptation  
219 ( $F(1,22) = 0.79$ ,  $p = .385$ ,  $pEta^2 = 0.03$  for the factor group (BM, BU);  $F(1,22) = 1.67$ ,  $p = .210$ ,  
220  $pEta^2 = 0.07$ , for mixed-model ANOVA with time\*group interaction).

221 Consolidation of motor memory (from Practice to Posttest) did not differ between Blocked  
222 groups regarding their recall of the first force field magnitude ( $F(1,22) = 0.47$ ,  $p = .498$ ,  $pEta^2 =$

223 0.02) or regarding all force field magnitudes ( $F(1,22) = 0.06, p = .808, p\eta^2 < 0.01$ , for uncorrected  
224 time\*group interactions with factors time (Practice LT, Posttest FT; Practice LT, Posttest ALL)  
225 and group (BM, BU)). Although descriptive statistics indicate slight benefits for the BM group in  
226 recalling the very first force field magnitude during Posttest (Fig 2A, Fig 3A), this is not supported  
227 by additional post-hoc statistics ( $t(22) = -0.94, p = .358, d = -0.38$ , for uncorrected independent t-  
228 test between groups' Posttest FT performance). However, memory consolidation was significantly  
229 stronger for the Random group compared to the BM group ( $F(1,22) = 5.65, p = .029, p\eta^2 = 0.20$ )  
230 and descriptively stronger to the BU group ( $F(1,22) = 5.49, p = .054, p\eta^2 = 0.20$ , for FDR  
231 corrected time\*group interactions with factors time (Practice LT, Posttest ALL) and group (BM,  
232 R; BU, R)), which confirms the contextual interference effect.

233 We further investigated if retroactive inhibition affected the generalization from the  
234 dominant (Practice) to the non-dominant (Transfer) hand. No differences between Blocked groups  
235 ( $F(1,22) = 0.15, p = .701, p\eta^2 < 0.01$ , for time\*group interaction with factors time (Practice LT,  
236 Transfer FT) and group (BM, BU)) were observed and the Random group performed similar to  
237 both Blocked groups (BM vs. R:  $F(1,22) = 1.18, p = .568, p\eta^2 = 0.05$ ; BU vs. R:  $F(1,22) = 0.34,$   
238  $p = .580, p\eta^2 = 0.02$  for FDR corrected time\*group interactions with factors time (Practice LT,  
239 Transfer FT) and group (BM, R; BU, R)). However, further adaptation (quantified by Transfer LT  
240 - Transfer FT) was observed to be faster for the Random group (Fig 3B), with this effect becoming  
241 more pronounced if adaptation during Practice (Practice LT - Practice FT) is compared with  
242 adaptation during Transfer (BM vs. R:  $F(1,22) = 3.39, p = .079, p\eta^2 = 0.13$ ; BU vs. R:  $F(1,22) =$   
243  $8.05, p = .020, p\eta^2 = 0.27$ , for FDR corrected time\*group interaction with factors time (Practice  
244 LT - Practice FT, Transfer LT - Transfer FT) and group (BM, R; BU, R)). This indicates that,  
245 although motor memory generalization from Practice to Transfer did not differ between groups,  
246 adaptation within the Transfer test appears to be faster for the Random compared to both Blocked  
247 groups.  
248

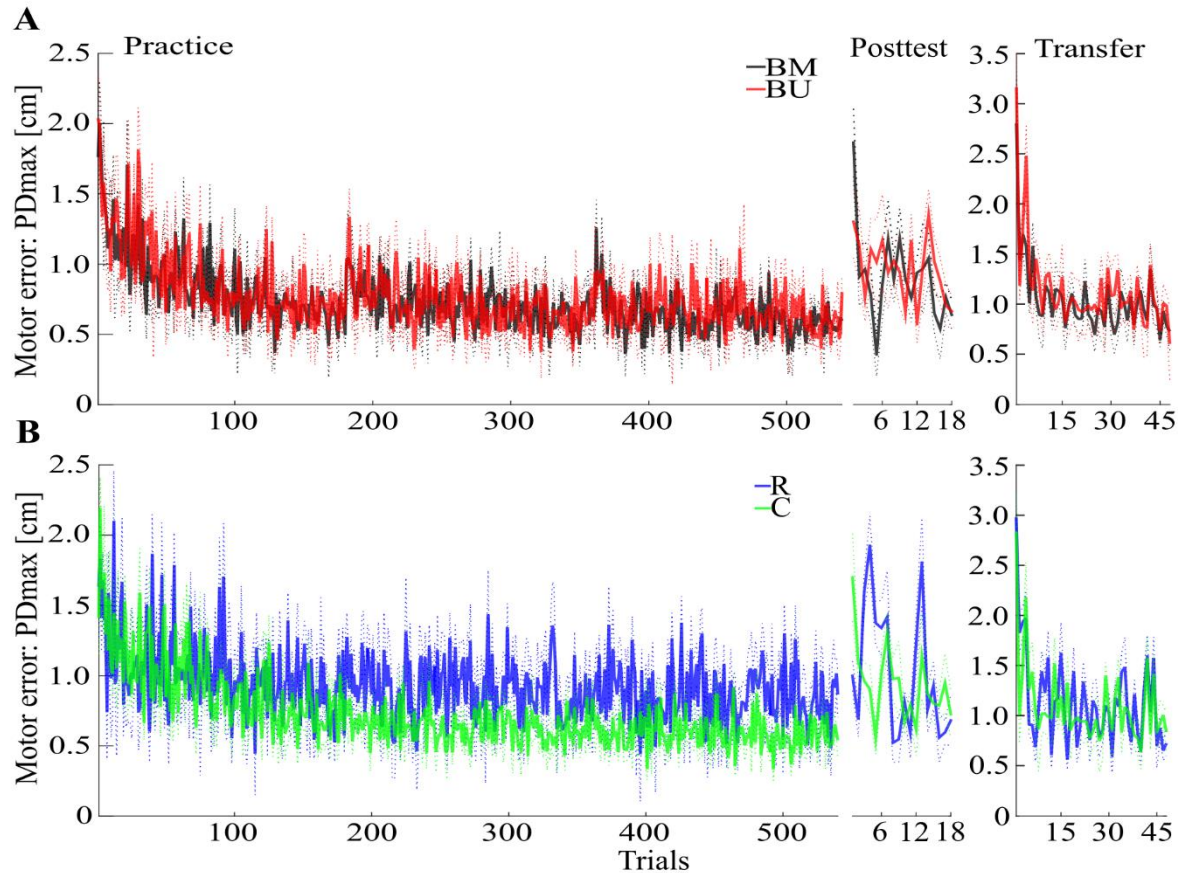

249  
250 Figure 2: Descriptive results. **A:** Progress of the mean motor error with SEM for Practice, Posttest,  
251 and Transfer test of the Blocked-Matched (BM) and the Blocked-Unmatched (BU) group. **B:**  
252 Progress of the mean motor error with SEM for the Random (R) and the Constant (C) group.  
253

### 254 3.2. Random practice improves mean memory consolidation of multiple force field 255 magnitudes

256 The second aim of this study was to examine if constant practice leads to better memory  
257 consolidation of only one force field magnitude than random practice and if random practice  
258 outperforms constant practice in the recall of multiple force field magnitudes. Our results show that  
259 memory consolidation of the Constant and of the Random group did not differ for each single force  
260 field magnitude (quantified by differences between Posttest FT/MT/LT and Practice LT. Posttest  
261 FT:  $t(22) = 0.89, p = .386, d = 0.36$ ; Posttest MT:  $U = 99, p = .171$ ; Posttest LT  $t(22) = 1.97, p =$   
262  $.122, d = 0.80$ , for FDR corrected t- and U-tests between groups (C, R)). However, the Random  
263 group showed a better mean memory consolidation across all force field magnitudes (Posttest ALL:  
264  $t(22) = 3.23, p = .016, d = 1.32$ , FDR corrected), with this effect most pronounced predicting high  
265 effect sizes using Bayesian statistics (see Supplementary Figure S2).

266 However, it is important to mention here that this consolidation effect occurred due to performance  
267 differences at the end of Practice, for there is no group difference regarding absolute Posttest values  
268 (Posttest FT:  $U = 46, p = .143, d = -0.36$ ; Posttest ALL:  $t(22) = -0.41, p = .684, d = -0.17$ , for t- and  
269 U-tests between groups (C, R)). This indicates that benefits of the Random group cannot be seen  
270 in the absolute Posttest performance. We confirmed this indication by showing that at least two  
271 parameters during Practice are having a confounding effect on the absolute Posttest performance  
272 across all groups, namely motor error ( $r = 0.56, p < .001$ ) and motor variability ( $r = 0.58, p < .001$ ,  
273 for uncorrected Pearson correlations of all participants (BM, BU, C, R) between Practice LT and

274 Posttest ALL and between the individual's standard deviation of the whole practice session and  
 275 Posttest ALL). However, since the Random group revealed a higher motor error ( $t(22) = -2.89$ ,  $p$   
 276  $= .009$ ,  $d = -1.18$ ) and a higher motor variability ( $t(22) = -4.22$ ,  $p < .001$ ,  $d = -1.72$ , for t-tests  
 277 between groups (R, C)) compared to the Constant group during Practice, correlation coefficients  
 278 might be compromised due to the inclusion of the Random group (Fig. 3C). A deeper investigation  
 279 of the data shows that Pearson coefficients of the Random group were indeed higher compared to  
 280 coefficients of the other groups but differed significantly only for the motor variability (motor error:  
 281  $z = -1.28$ ,  $p = .201$ ; motor variability:  $z = -2.63$ ,  $p = .018$ , for the uncorrected differences between  
 282 groups (R, [BM BU C]) after r-to-z transformation). This confirms that an increase in motor  
 283 variability during Practice might increase the motor memory consolidation (from Practice to  
 284 Posttest) but also confounds the absolute Posttest performance, with this effect being more  
 285 pronounced in the Random group than in all the other groups.  
 286

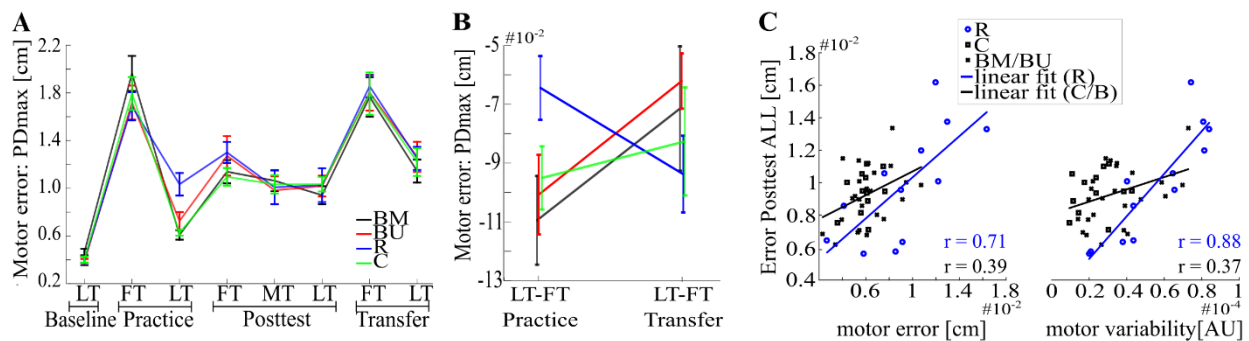

287  
 288 Figure 3: Deeper investigation of the behavioral results. **A**: Overview of the mean motor error with  
 289 SEM computed across trials and subjects for each group over the whole experiment. **B**: Differences  
 290 for Practice LT - Practice FT and Transfer LT - Transfer FT with SEM as an indication for the  
 291 range of motor adaptation. **C**: Correlation analysis for motor error of Practice LT (left) and motor  
 292 variability of Practice LT (right), each associated with Posttest ALL. Lines indicate linear fits for  
 293 the Random (blue) and all the other groups (black).  
 294

295 **4. Discussion**  
 296 Our results showed no differences between the two Blocked groups although the Posttest schedule  
 297 of one group (BM) did and the other schedule (BU) did not control for retroactive inhibition.  
 298 Compared to the Random group both Blocked groups showed a limited memory consolidation,  
 299 which depicts that retroactive inhibition does not account for CIE in motor adaptation tasks.  
 300 Comparisons between Random and Constant groups showed a similar memory consolidation for  
 301 each single force field magnitude. However, the Random group outperformed the Constant group  
 302 in its mean memory consolidation across all three force field magnitudes.  
 303

304 **4.1. Retroactive inhibition does not affect the contextual interference effect in motor**  
 305 **adaptation**

306 The experimental procedure of the BM group controlled for possible confounding effects of  
 307 retroactive inhibition. Nevertheless, BM performed similar to BU and its memory consolidation  
 308 was hampered compared to the Random group. These findings contradict previous skill learning  
 309 studies (Shea & Titzer, 1993, Del Rey et al., 1994, Shewokis et al., 1998), assuming retroactive  
 310 inhibition as the underlying mechanism for the contextual interference effect. Although retroactive  
 311 inhibition seemed to decrease the Posttest performance in the BU group (Fig. 3A), this effect was  
 312 too small to explain the benefits after random practice.



313           These benefits for the Random group were also observed when testing for the generalization  
314 of memory to the contralateral hand. This finding concurs with the literature, which frequently  
315 showed CIE for transfer tests in skill learning tasks (e.g. Shea & Morgan, 1979, Brady, 2004,  
316 Wright et al., 2015) and reproduces earlier findings from our lab using a motor adaptation task  
317 (Thürer & Weber et al. 2018). Our results indicate that participants of the Random group were not  
318 only able to consolidate better in the meantime between sessions, leading to similar initial  
319 performances in the Post- and Transfer test, they also were able to adapt faster towards the force  
320 field condition with their left hand. This positive effect of variability on subsequent motor  
321 adaptation is in line with a previous study, demonstrating that participants revealing a highly  
322 variable baseline period adapt faster during the subsequent practice period (Wu et al., 2014). It is  
323 assumed that this positive effect occurred due to noise in the motor planning system but not due to  
324 noise in the motor execution system (Dhawale et al., 2017). That leads to the suggestion that the  
325 nervous system, at least in some way, uses the knowledge of uncertainty of measured and/or  
326 predicted feedback (Izawa & Shadmehr, 2008) to improve motor adaptation (Wei & Körding,  
327 2010). However, future work is needed to investigate this more deeply.

#### 328 329           **4.2. Contextual interference improves only the mean memory consolidation of multiple** 330           **force field magnitudes**

331 Although CIE reflects a widely accepted phenomenon and seems to be unaffected by retroactive  
332 inhibition in motor adaptation tasks, it is not clear whether random practice is always beneficial  
333 over constant practice. Our results showed that benefits of random compared to constant practice  
334 regarding motor memory consolidation occur only if multiple force field magnitudes are retested.  
335 This indicates that memory consolidation of a single task might not be improved by a highly  
336 variable practice schedule. This concurs with the especial skill effect for skill learning (Breslin et  
337 al. 2010) but contradicts previous work regarding random practice (Shea & Kohl, 1991).

338           This finding is also in line with our correlation results. We were able to show that both, an  
339 increased motor error and an increased motor variability during Practice hamper the absolute  
340 Posttest performance. Especially the absolute Posttest performance of the Random group was  
341 reduced by the confounding effect of motor variability. However, it is important to note that  
342 absolute values of Posttest performance did not differ significantly between groups. Nevertheless,  
343 derived from a practical perspective, Random practice might be the better choice of scheduling a  
344 practice session since it leads to similar results than constant practice but has the opportunity to  
345 increase mean memory consolidation of multiple force field magnitudes and to enhance the  
346 generalization, in terms of faster re-adaptation on the contralateral hand (Fig. 3B).

347           In addition, it might be that a lower amount of motor variability during practice would lead to  
348 the same consolidation benefits but would also lead to better absolute performance values of the  
349 Random compared to the Blocked or the Constant group. In a previous study, we used a random  
350 practice design with lower inter-trial variabilities and were able to show better absolute  
351 performance values for Random compared to Blocked groups throughout the whole transfer test  
352 (Thürer & Weber et al., 2018). This indicates that the beneficial potential of variable practice  
353 depends on the right amount of variability during practice.

#### 354 355           **4.3. Limitations**

356 This study showed some minor limitations, which we would like to address. The Constant group  
357 trained the same amount of trials as the other groups but each subject of only one force field  
358 magnitude. Therefore, this group was able to draw on a greater practice experience for one specific  
359 magnitude compared to the other groups. We cannot state how much this affected the results but

360 from a practical perspective it was important to have the same amount of practice time for each  
361 group.

362 The force field magnitudes might have been too different and, thus, induced a too high  
363 practice variability in the Random group. This might be the reason why we were not able to show  
364 absolute Posttest and Transfer test performance benefits for the Random group. In a previous study  
365 with a lower amount of variability, we were able to show these absolute benefits after Random  
366 practice in the transfer test on the contralateral hand (Thürer & Weber et al., 2018).

367 The order of Post- and Transfer tests was not counter-balanced. Therefore, similar group  
368 performances in the first Transfer trials might be caused by the 18 Posttest trials. However, we  
369 were previously able to show that contralateral transfer from the dominant to the non-dominant  
370 hand after random practice is almost independent of the Posttest performance (Thürer & Weber et  
371 al., 2018) and, therefore, suggest that this had only minor effects on our results.

372 In this study, we investigated motor adaptation and not skill acquisition and, therefore, our  
373 interpretations cannot be generalized to skill learning tasks. However, from a theoretical point of  
374 view, confounding effects of retroactive inhibition should be more prone to happen in motor  
375 adaptation than in skill acquisition, due to a bigger potential overlap of the underlying neural  
376 structures.

377

## 378 **5. Conclusion**

379 In this study, we were able to show that the contextual interference effect represents a valid learning  
380 phenomenon that is not affected by retroactive inhibition. Furthermore, we were able to show that  
381 benefits of random practice are more related to the memory consolidation of multiple tasks /  
382 parameters and to a faster re-adaptation on the contralateral hand. However, variability in general  
383 must not always be beneficial regarding a single task / parameter or regarding the absolute  
384 performance values in a posttest. However, it remains unsolved how the motor system uses  
385 variability to improve subsequent motor memory consolidation, which needs further investigation  
386 on the neurobiological level.

387

## 388 **Acknowledgment**

389 We like to thank Alexander Wolpert for his technical assistance and Ernst Hossner for the fruitful  
390 discussions and his valuable input.

391

## 392 **Author contribution statement**

393 The study was designed by BT, AF, and TS. SG recorded the data and BT performed the data  
394 processing and statistical analysis. BT wrote the first draft of the manuscript and all authors  
395 contributed to manuscript revision. All authors read and approved the submitted version of the  
396 manuscript.

397

## 398 **Conflict of interest statement**

399 The authors declare that the research was conducted in the absence of any commercial or financial  
400 relationships that could be construed as a potential conflict of interest.

401

## 402 **Funding**

403 This work was supported by the Graduate Funding from the German States. We acknowledge  
404 support by Deutsche Forschungsgemeinschaft and Open Access Publishing Fund of Karlsruhe  
405 Institute of Technology.

406

407

## 408 Literature

- 409 Battig WF (1972). Intratask interference as a source of facilitation in transfer and retention. In:  
410 *Topics in learning and performance* (Thompson RF and Voss JF, eds), pp131-159. New  
411 York: Academic Press.
- 412 Benjamini Y, Hochberg Y. (1995). Controlling the false discovery rate: a practical and powerful  
413 approach to multiple testing. *J R Stat Soc Ser B* 57, 289-300.
- 414 Benjamini Y, Yekutieli D (2001). The control of the false discovery rate in multiple testing under  
415 dependency. *Ann Stat* 29, 1165-1188.
- 416 Brady F (2004). Contextual interference: a meta-analytic study. *Percept Mot Skills* 99(1), 116-126.
- 417 Brady, F. (2008). The contextual interference effect and sport skills. *Perceptual and Motor Skills*,  
418 106(2), 461–472.
- 419 Brashers-Krug T, Shadmehr R, Bizzi E (1996). Consolidation in human motor memory. *Nature*  
420 382(6588), 252.
- 421 Breslin G, Hodges NJ, Kennedy R, Hanlon M, Williams AM (2010). An especial skill: Support for  
422 a learned parameters hypothesis. *Acta Psychologica* 134(1), 55–60.  
423 <https://doi.org/10.1016/J.ACTPSY.2009.12.004>
- 424 Cohen J (1988). *Statistical power analysis for the behavioral sciences*. New York: Academic Press.
- 425 Del Rey P, Liu X, Simpson KJ (1994). Does retroactive inhibition influence contextual interference  
426 effects?. *Res Q Exerc Sport*, 65(2), 120-126.
- 427 Dhawale AK, Smith MA, Ölveczky BP (2017). The role of variability in motor learning. *Annu Rev*  
428 *Neurosci* 40, 479-98.
- 429 Izawa J, Shadmehr R (2008). On-line processing of uncertain information in visuomotor control. *J*  
430 *Neurosci* 28, 11360.
- 431 JASP Team (2018). JASP (Version 0.8.6) [Computer software].
- 432 Kantak SS, Sullivan KJ, Fisher BE, Knowlton BJ, Winstein CJ (2010). Neural substrates of motor  
433 memory consolidation depend on practice structure. *Nat Neurosci* 13, 923-925.
- 434 Krakauer JW, Mazzoni P (2011). Human sensorimotor learning: adaptation, skill, and beyond.  
435 *Curr Opin Neurobiol* 21: 636–644.
- 436 Lage GM, Ugrinowitsch H, Apolinário-Souza T, Vieira MM, Albuquerque MR, Benda RN (2015).  
437 Repetition and variation in motor practice: A review of neural correlates. *Neurosci*  
438 *Biobehav Rev*, 57, 132–141. <https://doi.org/10.1016/j.neubiorev.2015.08.012>
- 439 Lee TD, Magill RA (1983). The Locus of Contextual Interference in Motor-Skill Acquisition. *J*  
440 *Exp Psychol Learn Mem Cogn* 9, 730-746.
- 441 Magill RA, Hall KG (1990). A review of the contextual interference effect in motor skill  
442 acquisition. *Hum Mov Sci* 9, 241-289.
- 443 Nuzzo R (2014). Scientific method: statistical errors. *Nature* 506(7487), 150.
- 444 Oldfield RC (1971). The assessment and analysis of handedness: the Edinburgh inventory.  
445 *Neuropsychologia* 9(1), 97-113.
- 446 Robertson EM, Pascual-Leone A, Miall RC (2004). Current concepts in procedural consolidation.  
447 *Nat Rev Neurosci* 5(7), 576-582.
- 448 Rouder JN, Morey RD, Speckman PL, Province JM (2012). Default Bayes factors for ANOVA  
449 designs. *J Math Psychol* 56(5), 356–374. <https://doi.org/10.1016/j.jmp.2012.08.001>
- 450 Scheidt RA, Dingwell JB, Mussa-Ivaldi FA (2001). Learning to move amid uncertainty. *J*  
451 *Neurophysiol* 86, 971-985.
- 452 Schmidt, R. A. (1975). A schema theory of discrete motor skill learning. *Psychological Review*,  
453 82, 225–260

- 454 Schmidt RA, Lee TD (2011). *Motor control and learning: A behavioral emphasis*. Champaign, IL:  
455 Human Kinetics.
- 456 Schmidt, R.A., Lee, T.D., Winstein, C.J., Wulf, G. & Zelaznik, H.N. (2018). *Motor Control and*  
457 *Learning: A Behavioral Emphasis* (6th ed.). Champaign, IL: Human Kinetics.
- 458 Shea CH, Kohl RM (1991). Composition of practice: Influence on the retention of motor skills.  
459 *Res Q Exerc Sport* 62(2), 187-195.
- 460 Shea JB, Morgan RL (1979). Contextual interference effects on the acquisition, retention, and  
461 transfer of a motor skill. *J Exp Psychol Hum Learn* 5, 179-187.
- 462 Shea JB, Titzer RC (1993). The influence of reminder trials on contextual interference effects. *J*  
463 *Mot Behav* 25(4), 264-274.
- 464 Shea JB, Zimny ST (1983). Context effects in memory and learning movement information. In:  
465 *Memory and control of action* (Magill RA, ed.) pp. 345–366. North-Holland.
- 466 Shewokis PA, Del Rey P, Simpson KJ (1998). A test of retroactive inhibition as an explanation of  
467 contextual interference. *Res Q Exerc Sport* 69(1), 70-74.
- 468 Thüerer B, Stockinger C, Focke A, Putze F, Schultz T, Stein T (2016). Increased gamma band power  
469 during movement planning coincides with motor memory retrieval. *NeuroImage* 125, 172-  
470 181.
- 471 Thüerer B, Stockinger C, Putze F, Schultz T, Stein T (2017). Mechanisms within the Parietal Cortex  
472 Correlate with the Benefits of Random Practice in Motor Adaptation. *Front Hum Neurosci*  
473 11, 1–11. <https://doi.org/10.3389/fnhum.2017.00403>
- 474 Thüerer B, Weber FD, Born J, Stein T (2018). Variable training but not sleep improves consolidation  
475 of motor adaptation. *Sci Rep* 8(1), 15977. <https://doi.org/10.1038/s41598-018-34225-w>
- 476 Wei K, Körding K (2010). Uncertainty of feedback and state estimation determines the speed of  
477 motor adaptation. *Front Comp Neurosci* 4, 11. <https://doi.org/10.3389/fncom.2010.00011>
- 478 Wolpert DM, Ghahramani Z, Jordan MI (1995). An internal model for sensorimotor integration.  
479 *Science* 269(5232), 1880-1882.
- 480 Wright D, Verwey W, Buchanen J, Chen J, Rhee J, Immink M (2015). Consolidating behavioral  
481 and neurophysiologic findings to explain the influence of contextual interference during  
482 motor sequence learning. *Psychon Bull Rev* 1-21.
- 483 Wu HG, Miyamoto YR, Gonzalez Castro LN, Ölveczky BP, Smith MA (2014). Temporal structure  
484 of motor variability is dynamically regulated and predicts motor learning ability. *Nat*  
485 *Neurosci* 17, 312-21.
